# Supplementary material for: Feral frogs, native newts, and chemical cues: identifying threats from and management opportunities for invasive African Clawed Frogs in Washington state
Source: PeerJ journal article supplement (doi:10.7717/peerj.17307), 2024-05-10

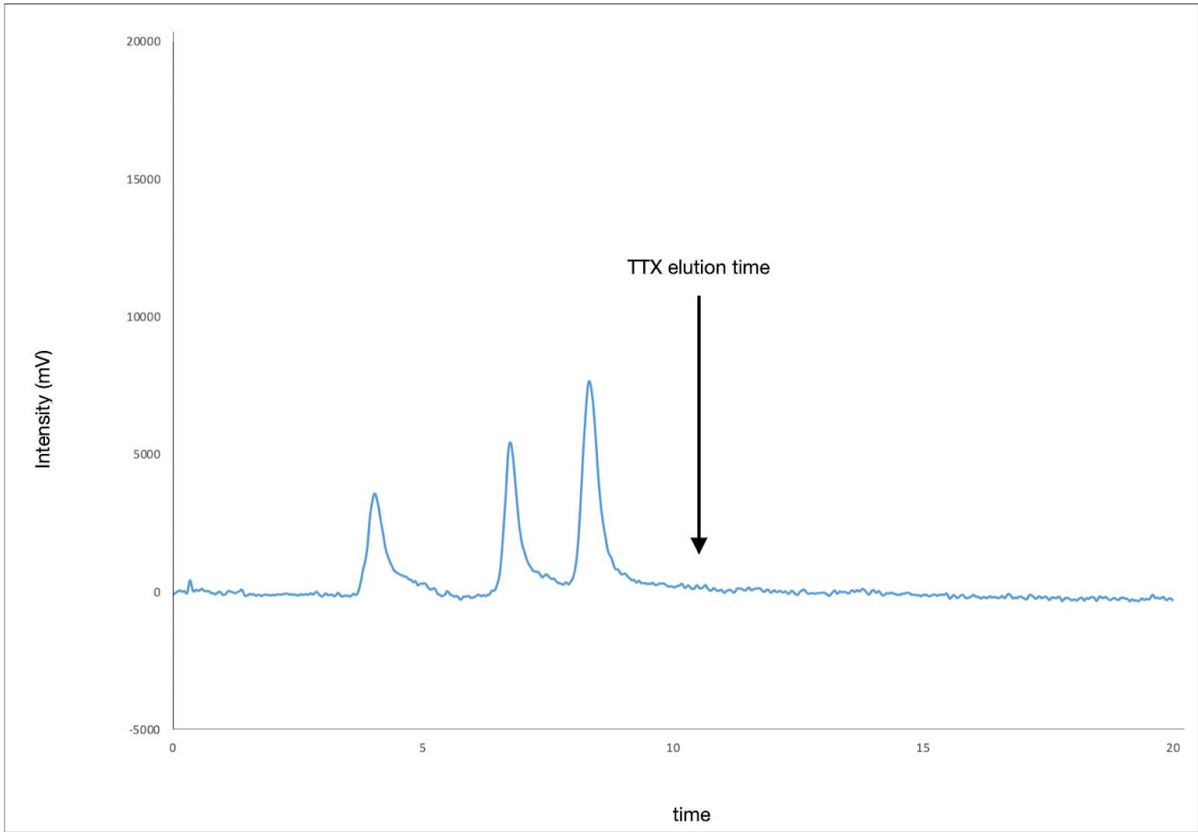

Supplement: FigureA1.pdf [file FigureA1.pdf]
